# Supplementary material for: Identification of MOSPD2, a novel scaffold for endoplasmic reticulum membrane contact sites
Source: PubMed Central journal article supplement — EMBO Rep. 2018 Jun 1;19(7):e45453. doi: 10.15252/embr.201745453 (PMC6030701; doi:10.15252/embr.201745453), 2018-06-01
Supplement: EMBR-19-e45453-s001.pdf [file EMBR-19-e45453-s001.pdf]

## APPENDIX

### Table of contents

|                                                                                                                              |            |
|------------------------------------------------------------------------------------------------------------------------------|------------|
| <b>Appendix Figure S1:</b> The recombinant MSP domain of MOSPD2 is monomeric, while recombinant VAP-A and VAP-B are dimeric. | <b>2</b>   |
| <b>Appendix Figure S2:</b> MOSPD2 recruitment to inter-organelle contact sites does not require VAP proteins                 | <b>3</b>   |
| <b>Appendix Figure S3:</b> MOSPD2 modulates inter-organelle contacts                                                         | <b>4</b>   |
| <b>Appendix Table S1:</b> Proteins co-precipitated with GFP-MOSPD2 and not with GFP-MOSPD2 RD/LD                             | <b>5-6</b> |

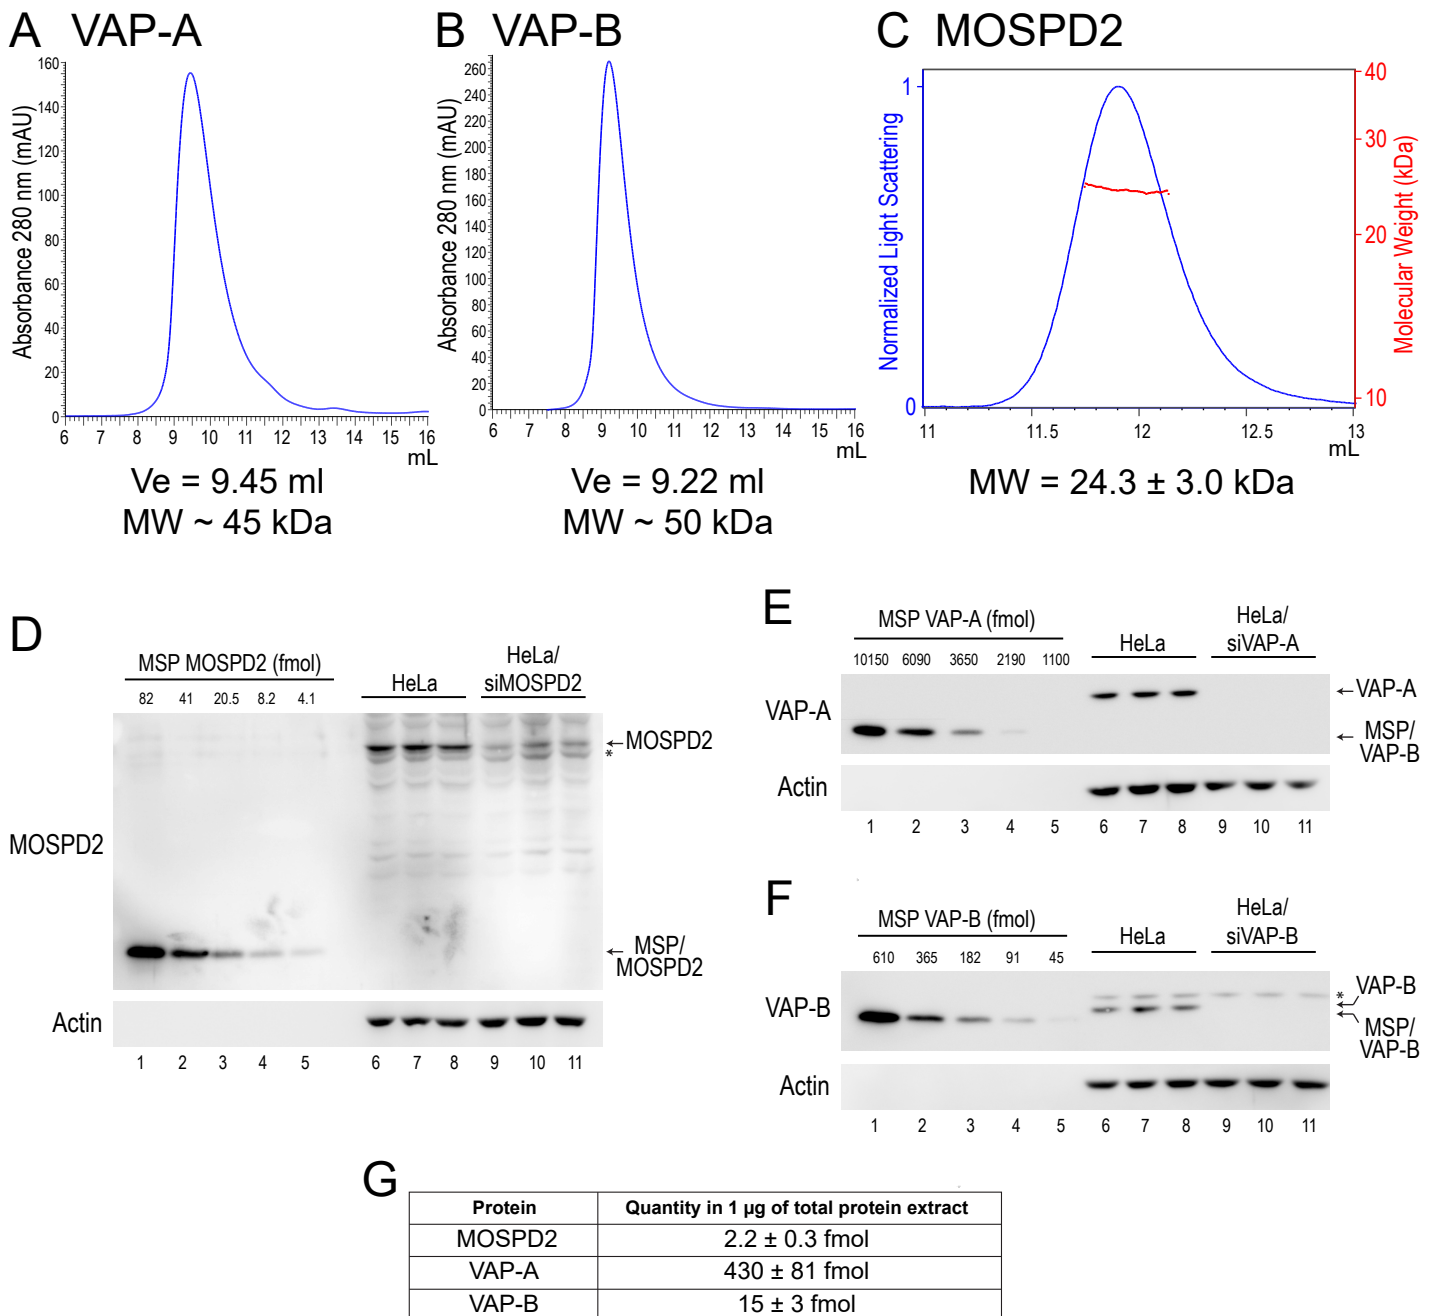

**Appendix Figure S1: The recombinant MSP domain of MOSPD2 is monomeric, while recombinant VAP-A and VAP-B are dimeric.**

A, B: Gel filtration profiles of recombinant VAP-A (A) and VAP-B (B) proteins. The proteins were loaded on a Superdex 75 10/300 GL column equilibrated with 20 mM Tris pH7.5, 150 mM NaCl. The column was calibrated with a mixture of bovine serum albumin, ovalbumin and ribonuclease (data not shown). The apparent molecular weights of VAP-A (theoretical MW: 24.6 kDa) and VAP-B (theoretical MW: 24.6 kDa) correspond to dimeric forms of the proteins.

C: Size Exclusion Chromatography with Multi-Angle Light Scattering (SEC-MALS) analysis of MOSPD2. The protein was loaded on a Superdex 75 10/300 GL column equilibrated with 20 mM Tris pH7.5, 150 mM NaCl, coupled to a MALS system (Wyatt technology). The MW detected corresponds to a monomer of MSP domain of MOSPD2 (theoretical MW: 24.2 kDa).

D-G: Quantification of MOSPD2, VAP-A and VAP-B protein levels in HeLa cells. Dilution series of recombinant MSP domains of MOSPD2 (D, lanes 1-5), VAP-A (E, lanes 1-5), and VAP-B (F, lanes 1-5) were analyzed by Western blot, together with protein extracts from HeLa cells (triplicate; lanes 6-8) and HeLa cells treated with siRNAs targeting MOSPD2 (D; triplicate, lanes 9-11), VAP-A (E; triplicate, lanes 9-11), and VAP-B (F; triplicate, lanes 9-11) as negative controls. Quantity of total protein extracts loaded: D: 13  $\mu$ g; E: 10  $\mu$ g and F: 10  $\mu$ g. Actin detection is shown as loading control. Chemiluminescence signals were quantified; standard curves established with recombinant proteins dilutions allowed the determination of MOSPD2, VAP-A and VAP-B quantities in protein extracts from HeLa cells (G). Experiments performed in triplicate.

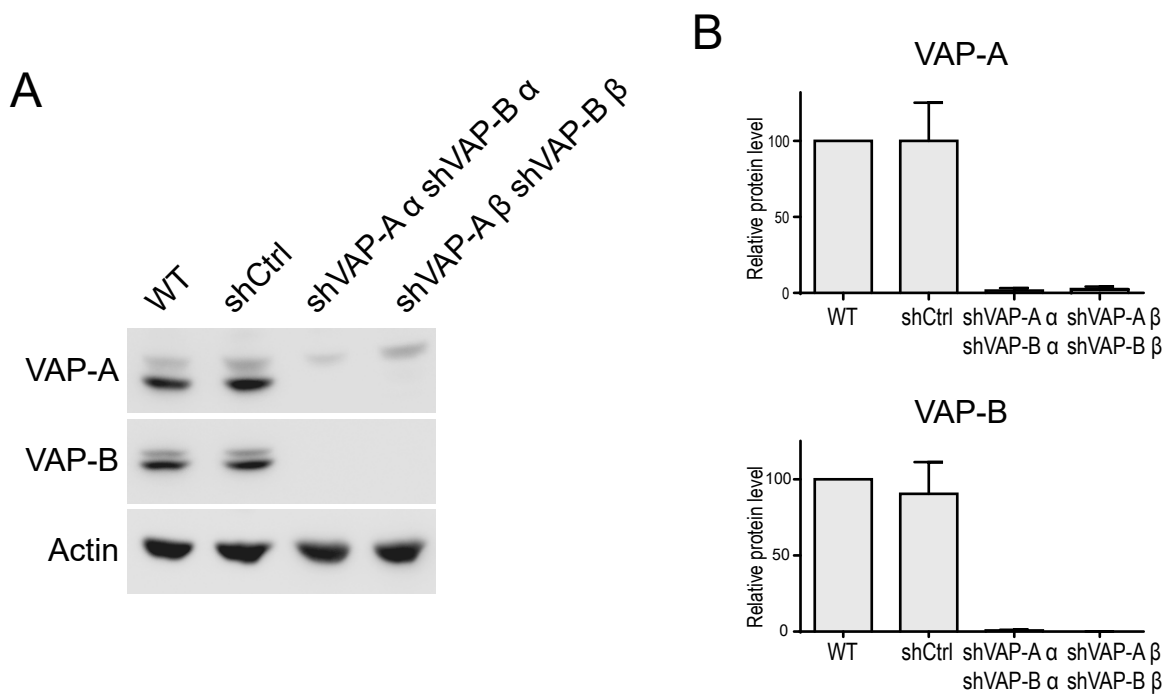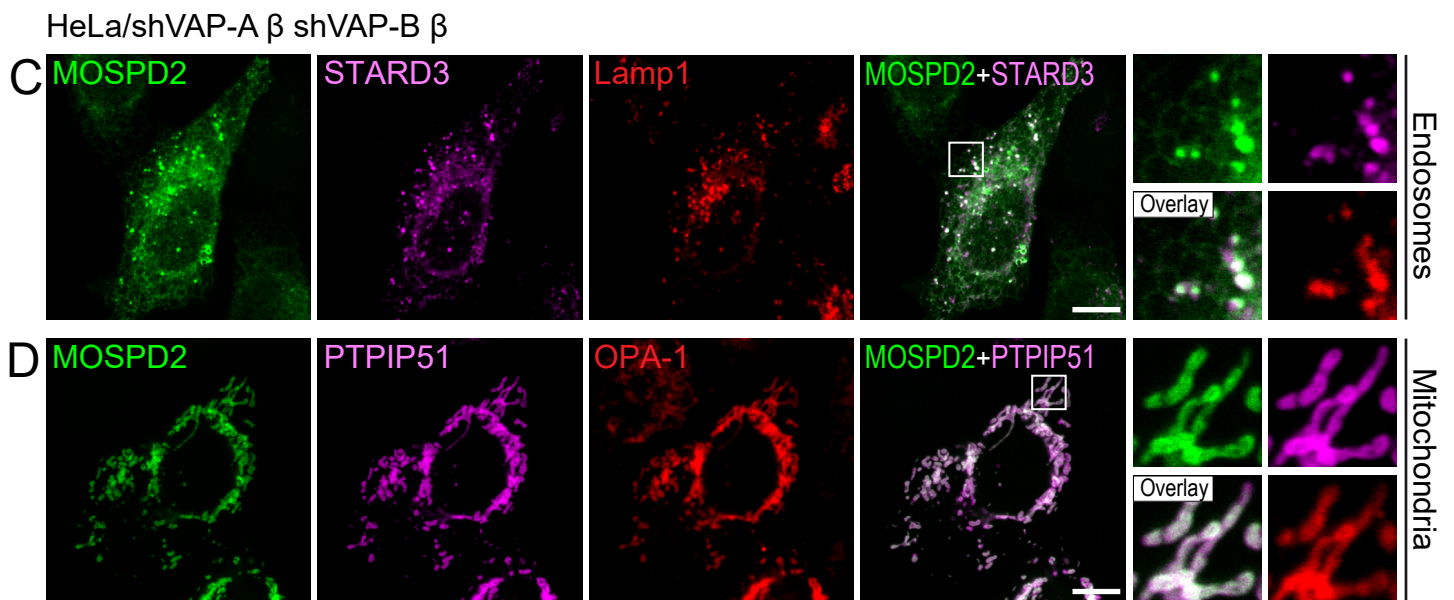

**Appendix Figure S2: MOSPD2 recruitment to inter-organelle contact sites does not require VAP proteins**

A: Western blot analysis of VAP protein level in control HeLa cells (WT) and in HeLa cells expressing a control shRNA (shCtrl) and two pairs of shRNAs targeting VAP-A and VAP-B (shVAP-A  $\alpha$ /shVAP-B  $\alpha$  or shVAP-A  $\beta$ /shVAP-B  $\beta$ ).

B: Quantification of VAP-A and VAP-B protein levels by Western blot. Means and error bars (SD) are shown. n: three independent experiments.

C,D: GFP-MOSPD2 (green) was co-expressed with Flag-STARD3 and HA-PTPIP51 in HeLa/shVAP-A  $\beta$  shVAP-B  $\beta$  cells, and labelled using anti-Flag (C; magenta), anti-HA (D; magenta), and anti-Lamp1 (C; red) or OPA-1 (D; red) as markers of late endosomes/lysosomes and mitochondria, respectively. The subpanels on the right are higher magnification (3.5x) images of the area outlined in white. The Overlay panel shows merged green and magenta images. Scale bars: 10  $\mu$ m.

**A** HeLa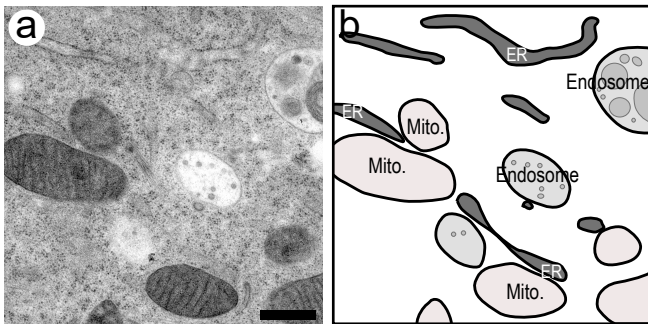**B** HeLa/shCtrl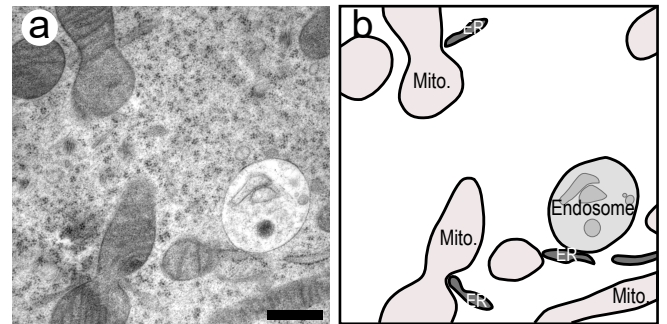**C** HeLa/shMOSPD2- $\alpha$ 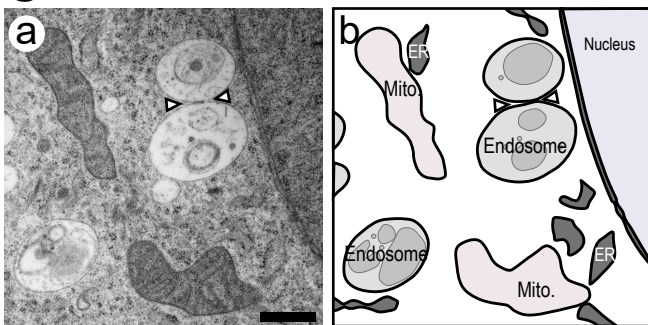**D** HeLa/shMOSPD2- $\beta$ 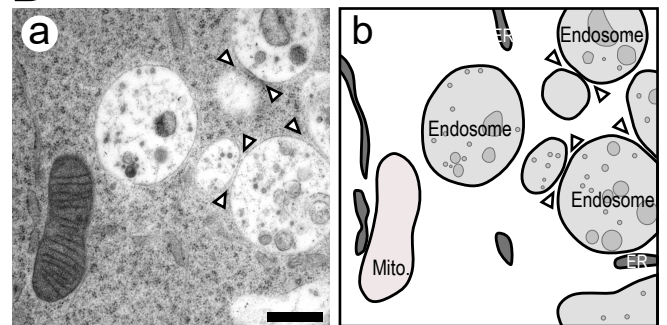**Appendix Figure S3: MOSPD2 modulates inter-organelle contacts**

A-D: TEM images of control HeLa cells (A: HeLa; B: HeLa/shCtrl) and MOSPD2-silenced HeLa cells (C: HeLa/shMOSPD2- $\alpha$ ; D: HeLa/shMOSPD2- $\beta$ ) is shown on the left (a). An interpretation scheme representing contacts between organelles is shown on the right (b); the ER, endosomes and ILV are in dark, light and medium gray, respectively. Mitochondria are in pink. Scale bars: 500  $\mu$ m.

Appendix Table S1

| Accession Number | Identity                                                                                                      | Ratio      |
|------------------|---------------------------------------------------------------------------------------------------------------|------------|
| Q13509           | Tubulin beta-3 chain OS=Homo sapiens GN=TUBB3 PE=1 SV=2 - [TBB3_HUMAN]                                        | 206,613333 |
| Q14764           | Major vault protein OS=Homo sapiens GN=MVP PE=1 SV=4 - [MVP_HUMAN]                                            | 96,1966667 |
| P42166           | Lamina-associated polypeptide 2, isoform alpha OS=Homo sapiens GN=TMPO PE=1 SV=2 - [LAP2A_HUMAN]              | 89,8       |
| Q96A33           | Coiled-coil domain-containing protein 47 OS=Homo sapiens GN=CCDC47 PE=1 SV=1 - [CCDC47_HUMAN]                 | 70,2766667 |
| Q9JHW5           | <b>GPN-loop GTPase 3 OS=Homo sapiens GN=GPN3 PE=1 SV=2 - [GPN3_HUMAN]</b>                                     | 35,5766667 |
| Q8TD16           | Protein bicaudal D homolog 2 OS=Homo sapiens GN=BICD2 PE=1 SV=1 - [BICD2_HUMAN]                               | 34,0666667 |
| Q96R06           | Sperm-associated antigen 5 OS=Homo sapiens GN=SPAG5 PE=1 SV=2 - [SPAG5_HUMAN]                                 | 31,4333333 |
| P52597           | Heterogeneous nuclear ribonucleoprotein F OS=Homo sapiens GN=HNRNPF PE=1 SV=3 - [HNRNPF_HUMAN]                | 26,92      |
| P16989           | Y-box-binding protein 3 OS=Homo sapiens GN=YBX3 PE=1 SV=4 - [YBOX3_HUMAN]                                     | 26,2366667 |
| <b>Q96TC7</b>    | <b>Regulator of microtubule dynamics protein 3 OS=Homo sapiens GN=RMDN3 PE=1 SV=2 - [RMD3_HUMAN]</b>          | 23,7266667 |
| F8WJN3           | Cleavage and polyadenylation-specificity factor subunit 6 OS=Homo sapiens GN=CPSP6 PE=1 SV=1 - [F8WJN3_HUMAN] | 22,4066667 |
| E9PDF6           | Unconventional myosin-Ib OS=Homo sapiens GN=MYO1B PE=1 SV=1 - [E9PDF6_HUMAN]                                  | 21,7666667 |
| P08670           | Vimentin OS=Homo sapiens GN=VIM PE=1 SV=4 - [VIME_HUMAN]                                                      | 19,84      |
| <b>Q9BXW6</b>    | <b>Oxysterol-binding protein-related protein 1 OS=Homo sapiens GN=OSBPL1A PE=1 SV=2 - [OSBL1_HUMAN]</b>       | 19,5566667 |
| Q5JR95           | 40S ribosomal protein S8 OS=Homo sapiens GN=RPS8 PE=1 SV=1 - [Q5JR95_HUMAN]                                   | 18,26      |
| P27694           | Replication protein A 70 kDa DNA-binding subunit OS=Homo sapiens GN=RPA1 PE=1 SV=2 - [RFA1_HUMAN]             | 17,9233333 |
| P42704           | Leucine-rich PPR motif-containing protein, mitochondrial OS=Homo sapiens GN=LRPPRC PE=1 SV=3 - [LRPPRC_HUMAN] | 17,5533333 |
| P17706           | Tyrosine-protein phosphatase non-receptor type 2 OS=Homo sapiens GN=PTN2 PE=1 SV=2 - [PTN2_HUMAN]             | 17,4366667 |
| P40939           | Trifunctional enzyme subunit alpha, mitochondrial OS=Homo sapiens GN=HADHA PE=1 SV=2 - [ECHA_HUMAN]           | 16,73      |
| G3V576           | <b>Heterogeneous nuclear ribonucleoproteins C1/C2 OS=Homo sapiens GN=HNRNPC PE=1 SV=1 - [G3V576_HUMAN]</b>    | 16,6266667 |
| A0A087WXX9       | Collagen alpha-1(V) chain OS=Homo sapiens GN=COL5A1 PE=1 SV=1 - [A0A087WXX9_HUMAN]                            | 16,5733333 |
| P35244           | Replication protein A 14 kDa subunit OS=Homo sapiens GN=RPA3 PE=1 SV=1 - [RFA3_HUMAN]                         | 14,7       |
| P42167           | Lamina-associated polypeptide 2, isoforms beta/gamma OS=Homo sapiens GN=TMPO PE=1 SV=2 - [LAP2B_HUMAN]        | 14,6366667 |
| P20042           | Eukaryotic translation initiation factor 2 subunit 2 OS=Homo sapiens GN=EIF2S2 PE=1 SV=2 - [IF2B_HUMAN]       | 14,5533333 |
| V9GY01           | Chromosome 15 open reading frame 23, isoform CRA_d OS=Homo sapiens GN=KNSTRN PE=1 SV=1 - [V9GY01_HUMAN]       | 14,3233333 |
| Q15155           | BET1 homolog OS=Homo sapiens GN=BET1 PE=1 SV=1 - [BET1_HUMAN]                                                 | 13,3133333 |
| P50991           | T-complex protein 1 subunit delta OS=Homo sapiens GN=CCT4 PE=1 SV=4 - [TCPD_HUMAN]                            | 13,1166667 |
| FSRHW4           | <b>Erlin-2 (Fragment) OS=Homo sapiens GN=ERLIN2 PE=1 SV=1 - [FSRHW4_HUMAN]</b>                                | 12,93      |
| X1WI28           | 60S ribosomal protein L10 (Fragment) OS=Homo sapiens GN=RPL10 PE=1 SV=7 - [X1WI28_HUMAN]                      | 12,8133333 |
| Q15545           | Transcription initiation factor TFIID subunit 7 OS=Homo sapiens GN=TAF7 PE=1 SV=1 - [TAF7_HUMAN]              | 11,63      |
| <b>C9JPK5</b>    | <b>MLN64 N-terminal domain homolog (Fragment) OS=Homo sapiens GN=STARD3NL PE=1 SV=1 - [C9JPK5_HUMAN]</b>      | 11,3766667 |
| Q13835           | Plakophilin-1 OS=Homo sapiens GN=PKP1 PE=1 SV=2 - [PKP1_HUMAN]                                                | 11,1466667 |
| Q8NC51           | Plasminogen activator inhibitor 1 RNA-binding protein OS=Homo sapiens GN=SERBP1 PE=1 SV=2 - [PAIRB_HUMAN]     | 11,0933333 |
| J3QR09           | Ribosomal protein L19 OS=Homo sapiens GN=RPL19 PE=1 SV=1 - [J3QR09_HUMAN]                                     | 10,9966667 |
| P54136           | Arginine-tRNA ligase, cytoplasmic OS=Homo sapiens GN=RARS PE=1 SV=2 - [SYRC_HUMAN]                            | 10,8       |
| M0R0F0           | 40S ribosomal protein S5 (Fragment) OS=Homo sapiens GN=RPS5 PE=1 SV=1 - [M0R0F0_HUMAN]                        | 10,57      |
| Q96AG4           | Leucine-rich repeat-containing protein 59 OS=Homo sapiens GN=LRRC59 PE=1 SV=1 - [LRC59_HUMAN]                 | 10,5433333 |
| J3QQQ9           | Uncharacterized protein OS=Homo sapiens PE=4 SV=1 - [J3QQQ9_HUMAN]                                            | 10,5       |
| A0A087X0U3       | Amino acid transporter OS=Homo sapiens GN=SLC1A3 PE=1 SV=1 - [A0A087X0U3_HUMAN]                               | 10,4066667 |
| A0A0J9YYL3       | Poly(U)-binding-splicing factor PUF60 (Fragment) OS=Homo sapiens GN=PUF60 PE=1 SV=1 - [A0A0J9YYL3_HUMAN]      | 10,1266667 |
| P62750           | 60S ribosomal protein L23a OS=Homo sapiens GN=RPL23A PE=1 SV=1 - [RL23A_HUMAN]                                | 9,9633333  |
| P62424           | 60S ribosomal protein L7a OS=Homo sapiens GN=RPL7A PE=1 SV=2 - [RL7A_HUMAN]                                   | 9,8366667  |
| Q8WXX5           | DnaJ homolog subfamily C member 9 OS=Homo sapiens GN=DNAJC9 PE=1 SV=1 - [DNJC9_HUMAN]                         | 9,6166667  |
| P09923           | Intestinal-type alkaline phosphatase OS=Homo sapiens GN=ALPI PE=1 SV=2 - [PPBI_HUMAN]                         | 9,54       |
| A0A0D9SF54       | Spectrin alpha chain, non-erythrocytic 1 OS=Homo sapiens GN=SPTAN1 PE=1 SV=1 - [A0A0D9SF54_HUMAN]             | 9,5066667  |
| <b>P22695</b>    | <b>Cytochrome b-c1 complex subunit 2, mitochondrial OS=Homo sapiens GN=UQCRC2 PE=1 SV=3 - [QCR2_HUMAN]</b>    | 9,28       |
| E7ETK0           | 40S ribosomal protein S24 OS=Homo sapiens GN=RPS24 PE=1 SV=1 - [E7ETK0_HUMAN]                                 | 9,2366667  |
| F8WAE5           | Eukaryotic translation initiation factor 2A OS=Homo sapiens GN=EIF2A PE=1 SV=1 - [F8WAE5_HUMAN]               | 9,1866667  |
| P33993           | DNA replication licensing factor MCM7 OS=Homo sapiens GN=MCM7 PE=1 SV=4 - [MCM7_HUMAN]                        | 9,0733333  |
| Q15717           | <b>ELAV-like protein 1 OS=Homo sapiens GN=ELAVL1 PE=1 SV=2 - [ELAV1_HUMAN]</b>                                | 9,0733333  |
| O43752           | Syntaxin-6 OS=Homo sapiens GN=STX6 PE=1 SV=1 - [STX6_HUMAN]                                                   | 9,0466667  |
| P62829           | 60S ribosomal protein L23 OS=Homo sapiens GN=RPL23 PE=1 SV=1 - [RL23_HUMAN]                                   | 8,91       |
| Q92841           | Probable ATP-dependent RNA helicase DDX17 OS=Homo sapiens GN=DDX17 PE=1 SV=2 - [DDX17_HUMAN]                  | 8,8466667  |
| H0YEN5           | 40S ribosomal protein S2 (Fragment) OS=Homo sapiens GN=RPS2 PE=1 SV=1 - [H0YEN5_HUMAN]                        | 8,6533333  |
| P49848           | Transcription initiation factor TFIID subunit 6 OS=Homo sapiens GN=TAF6 PE=1 SV=1 - [TAF6_HUMAN]              | 8,4866667  |
| P15927           | Replication protein A 32 kDa subunit OS=Homo sapiens GN=RPA2 PE=1 SV=1 - [RPA2_HUMAN]                         | 8,14       |
| <b>Q15042</b>    | <b>Rab3 GTPase-activating protein catalytic subunit OS=Homo sapiens GN=RAB3GAP1 PE=1 SV=3 - [RB3GP_HUMAN]</b> | 8,1066667  |
| O60506           | Heterogeneous nuclear ribonucleoprotein Q OS=Homo sapiens GN=SYNCRIP PE=1 SV=2 - [HNRPO_HUMAN]                | 8,1058558  |
| B4DUR8           | T-complex protein 1 subunit gamma OS=Homo sapiens GN=CCT3 PE=1 SV=1 - [B4DUR8_HUMAN]                          | 8,0966667  |
| O95573           | Long-chain-fatty-acid-CoA ligase 3 OS=Homo sapiens GN=ACSL3 PE=1 SV=3 - [ACSL3_HUMAN]                         | 8,0766667  |
| P36578           | 60S ribosomal protein L4 OS=Homo sapiens GN=RPL4 PE=1 SV=5 - [RL4_HUMAN]                                      | 8,07       |
| P60842           | Eukaryotic initiation factor 4A-1 OS=Homo sapiens GN=EIF4A1 PE=1 SV=1 - [IF4A1_HUMAN]                         | 8,0233333  |
| A0A0D9SFB3       | ATP-dependent RNA helicase DDX3X OS=Homo sapiens GN=DDX3X PE=1 SV=1 - [A0A0D9SFB3_HUMAN]                      | 7,8555556  |
| Q9BSD7           | Cancer-related nucleoside-triphosphatase OS=Homo sapiens GN=NTPCR PE=1 SV=1 - [NTPCR_HUMAN]                   | 7,8366667  |
| A0A087WXM6       | 60S ribosomal protein L17 (Fragment) OS=Homo sapiens GN=RPL17 PE=3 SV=1 - [A0A087WXM6_HUMAN]                  | 7,8033333  |
| H7BY29           | Mitochondrial amidoxime-reducing component 1 (Fragment) OS=Homo sapiens GN=MARC1 PE=1 SV=1 - [H7BY29_HUMAN]   | 7,73       |
| G5E9W7           | 28S ribosomal protein S22, mitochondrial OS=Homo sapiens GN=MRPS22 PE=1 SV=1 - [G5E9W7_HUMAN]                 | 7,5533333  |
| P02545           | Prelamin-A/C OS=Homo sapiens GN=LMNA PE=1 SV=1 - [LMNA_HUMAN]                                                 | 7,50962038 |
| Q08211           | ATP-dependent RNA helicase A OS=Homo sapiens GN=DHX9 PE=1 SV=4 - [DHX9_HUMAN]                                 | 7,3966667  |
| H7BYN3           | Transcription factor A, mitochondrial (Fragment) OS=Homo sapiens GN=TFAM PE=1 SV=1 - [H7BYN3_HUMAN]           | 7,12       |
| P19338           | Nucleolin OS=Homo sapiens GN=NCL PE=1 SV=3 - [NUCL_HUMAN]                                                     | 7,0782347  |

|            |                                                                                                                                  |            |
|------------|----------------------------------------------------------------------------------------------------------------------------------|------------|
| Q96KK5     | Histone H2A type 1-H OS=Homo sapiens GN=HIST1H2AH PE=1 SV=3 - [H2A1H_HUMAN]                                                      | 7,0227577  |
| Q96CS3     | FAS-associated factor 2 OS=Homo sapiens GN=FAF2 PE=1 SV=2 - [FAF2_HUMAN]                                                         | 6,92333333 |
| B1AK87     | Capping protein (Actin filament) muscle Z-line, beta, isoform CRA_a OS=Homo sapiens GN=CAPZB PE=1 SV=1 - [B1AK87_HUMAN]          | 6,91333333 |
| F5GY55     | DNA damage-binding protein 1 OS=Homo sapiens GN=DDB1 PE=1 SV=1 - [F5GY55_HUMAN]                                                  | 6,83666667 |
| P61026     | Ras-related protein Rab-10 OS=Homo sapiens GN=RAB10 PE=1 SV=1 - [RAB10_HUMAN]                                                    | 6,78       |
| Q13200     | 26S proteasome non-ATPase regulatory subunit 2 OS=Homo sapiens GN=PSMD2 PE=1 SV=3 - [PSMD2_HUMAN]                                | 6,78       |
| P61353     | 60S ribosomal protein L27 OS=Homo sapiens GN=RPL27 PE=1 SV=2 - [RL27_HUMAN]                                                      | 6,58333333 |
| P09874     | Poly [ADP-ribose] polymerase 1 OS=Homo sapiens GN=PARP1 PE=1 SV=4 - [PARP1_HUMAN]                                                | 6,57666667 |
| Q7Z406     | Myosin-14 OS=Homo sapiens GN=MYH14 PE=1 SV=2 - [MYH14_HUMAN]                                                                     | 6,45       |
| P05141     | ADP/ATP translocase 2 OS=Homo sapiens GN=SLC25A5 PE=1 SV=7 - [ADT2_HUMAN]                                                        | 6,39215686 |
| Q13049     | E3 ubiquitin-protein ligase TRIM32 OS=Homo sapiens GN=TRIM32 PE=1 SV=2 - [TRI32_HUMAN]                                           | 6,35       |
| Q8IVT2     | Mitotic interactor and substrate of PLK1 OS=Homo sapiens GN=MISP PE=1 SV=1 - [MISP_HUMAN]                                        | 6,34333333 |
| A0A0G2JRY5 | Transcription initiation factor TFIID subunit 4 (Fragment) OS=Homo sapiens GN=TAF4 PE=1 SV=1 - [A0A0G2JRY5_HUMAN]                | 5,84       |
| A0A087WWY3 | Filamin-A OS=Homo sapiens GN=FLNA PE=1 SV=1 - [A0A087WWY3_HUMAN]                                                                 | 5,83666667 |
| J3KTA4     | Probable ATP-dependent RNA helicase DDX5 OS=Homo sapiens GN=DDX5 PE=1 SV=1 - [J3KTA4_HUMAN]                                      | 5,71927966 |
| Q9UJ50     | Calcium-binding mitochondrial carrier protein Aralar2 OS=Homo sapiens GN=SLC25A13 PE=1 SV=2 - [CMC2_HUMAN]                       | 5,69       |
| P51570     | Galactokinase OS=Homo sapiens GN=GALK1 PE=1 SV=1 - [GALK1_HUMAN]                                                                 | 5,64666667 |
| Q07666     | KH domain-containing, RNA-binding, signal transduction-associated protein 1 OS=Homo sapiens GN=KHDRBS1 PE=1 SV=1 - [KHDR1_HUMAN] | 5,54       |
| Q15526     | Surfeit locus protein 1 OS=Homo sapiens GN=SURF1 PE=1 SV=1 - [SURF1_HUMAN]                                                       | 5,47333333 |
| P0CW18     | Serine protease 56 OS=Homo sapiens GN=PRSS56 PE=1 SV=1 - [PRSS56_HUMAN]                                                          | 5,42       |
| Q15637     | Splicing factor 1 OS=Homo sapiens GN=SF1 PE=1 SV=4 - [SF01_HUMAN]                                                                | 5,4        |
| Q13283     | Ras GTPase-activating protein-binding protein 1 OS=Homo sapiens GN=G3BP1 PE=1 SV=1 - [G3BP1_HUMAN]                               | 5,35547122 |
| P55072     | Transitional endoplasmic reticulum ATPase OS=Homo sapiens GN=VCP PE=1 SV=4 - [TERA_HUMAN]                                        | 5,34295416 |
| I3L0K7     | Heat shock protein 75 kDa, mitochondrial OS=Homo sapiens GN=TRAP1 PE=1 SV=1 - [I3L0K7_HUMAN]                                     | 5,3        |
| F5GYQ2     | Multifunctional methyltransferase subunit TRM112-like protein OS=Homo sapiens GN=TRMT112 PE=1 SV=1 - [F5GYQ2_HUMAN]              | 5,12       |
| Q95249     | Golgi SNAP receptor complex member 1 OS=Homo sapiens GN=GOSR1 PE=1 SV=1 - [GOSR1_HUMAN]                                          | 5,11378978 |
| Q96IR7     | 4-hydroxyphenylpyruvate dioxygenase-like protein OS=Homo sapiens GN=HPDL PE=1 SV=1 - [HPDL_HUMAN]                                | 5,07       |
| P62701     | 40S ribosomal protein S4, X isoform OS=Homo sapiens GN=RPS4X PE=1 SV=2 - [RS4X_HUMAN]                                            | 5,06640927 |
| H9KV75     | Alpha-actinin-1 OS=Homo sapiens GN=ACTN1 PE=1 SV=1 - [H9KV75_HUMAN]                                                              | 5,03       |
| Q13885     | Tubulin beta-2A chain OS=Homo sapiens GN=TUBB2A PE=1 SV=1 - [TBB2A_HUMAN]                                                        | 5,0245483  |
| Q9H2M9     | Rab3 GTPase-activating protein non-catalytic subunit OS=Homo sapiens GN=RAB3GAP2 PE=1 SV=1 - [RBGPR_HUMAN]                       | 4,97       |
| P06899     | Histone H2B type 1-J OS=Homo sapiens GN=HIST1H2BJ PE=1 SV=3 - [H2B1J_HUMAN]                                                      | 4,93666667 |
| C9JZ20     | Prohibitin (Fragment) OS=Homo sapiens GN=PHB PE=1 SV=1 - [C9JZ20_HUMAN]                                                          | 4,93666667 |
| Q96I24     | Far upstream element-binding protein 3 OS=Homo sapiens GN=FUBP3 PE=1 SV=2 - [FUBP3_HUMAN]                                        | 4,89333333 |
| Q15046     | Lysine--tRNA ligase OS=Homo sapiens GN=KARS PE=1 SV=3 - [SYK_HUMAN]                                                              | 4,88666667 |
| Q04837     | Single-stranded DNA-binding protein, mitochondrial OS=Homo sapiens GN=SSBP1 PE=1 SV=1 - [SSBP_HUMAN]                             | 4,87731629 |
| HOYLY7     | Calcineurin B homologous protein 1 (Fragment) OS=Homo sapiens GN=CHP1 PE=1 SV=1 - [HOYLY7_HUMAN]                                 | 4,86333333 |
| Q14849     | StAR-related lipid transfer protein 3 OS=Homo sapiens GN=STARD3 PE=1 SV=2 - [STAR3_HUMAN]                                        | 4,84       |

Proteins possessing an FFAT motif and shown to interact with VAP in the literature

#### Proteins investigated in our study

Proteins identified as MOSPD2 partner in databases (<https://thebiogrid.org/>)

Proteins identified as VAP-A or VAP-B partner in databases

Protein extracts from HeLa cells stably expressing GFP-MOSPD2 or GFP-MOSPD2 RD/LD were immunoprecipitated using a GFP-trap resin. Eluted protein were analyzed by tandem mass spectrometry. For the analysis, mass spectrometry scores were corrected by adding 1 to each score. Proteins were filtered for a ratio (Score Protein X in GFP-MOSPD2 sample)/(Score Protein X in GFP-MOSPD2 RD/LD sample)>4.84.
