# Supplementary figures and images for: Identification of MOSPD2, a novel scaffold for endoplasmic reticulum membrane contact sites
Source: PubMed Central journal article supplement — EMBO Rep. 2018 Jun 1;19(7):e45453. doi: 10.15252/embr.201745453 (PMC6030701; doi:10.15252/embr.201745453), 2018-06-01

**Figure 1**

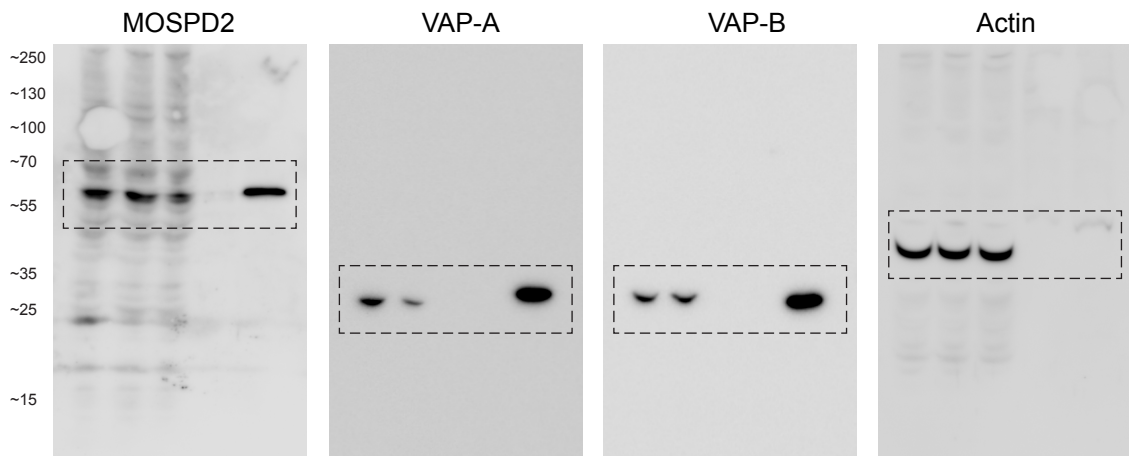

Supplement: EMBR-19-e45453-s003.pdf [file EMBR-19-e45453-s003.pdf]

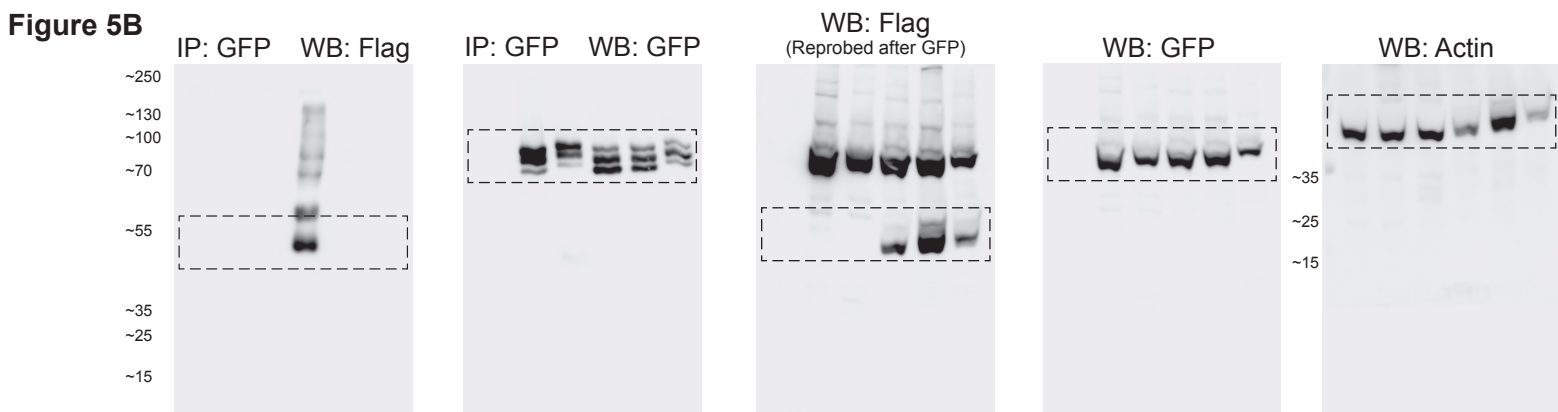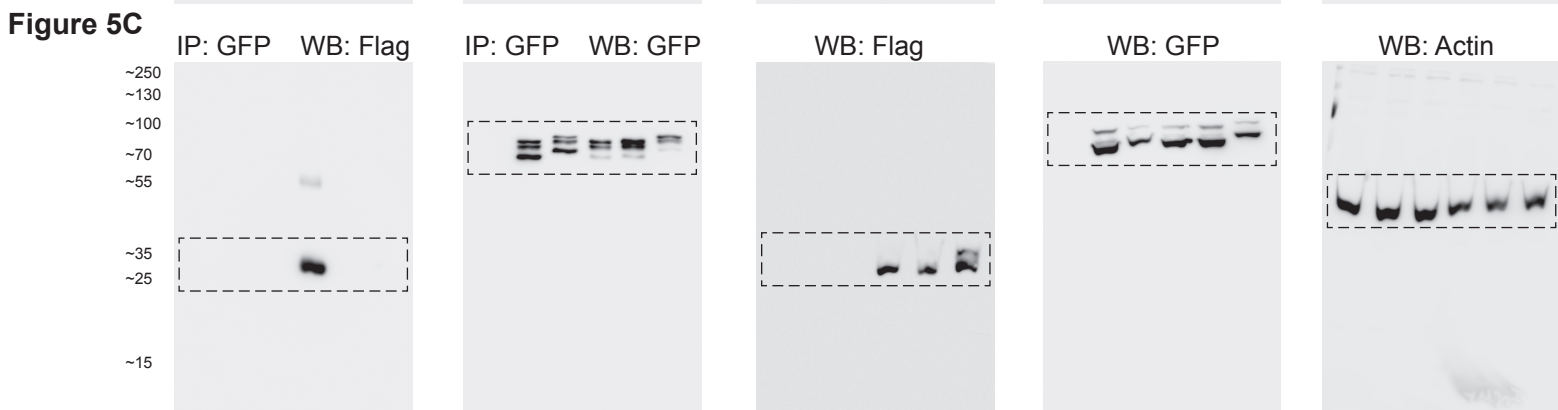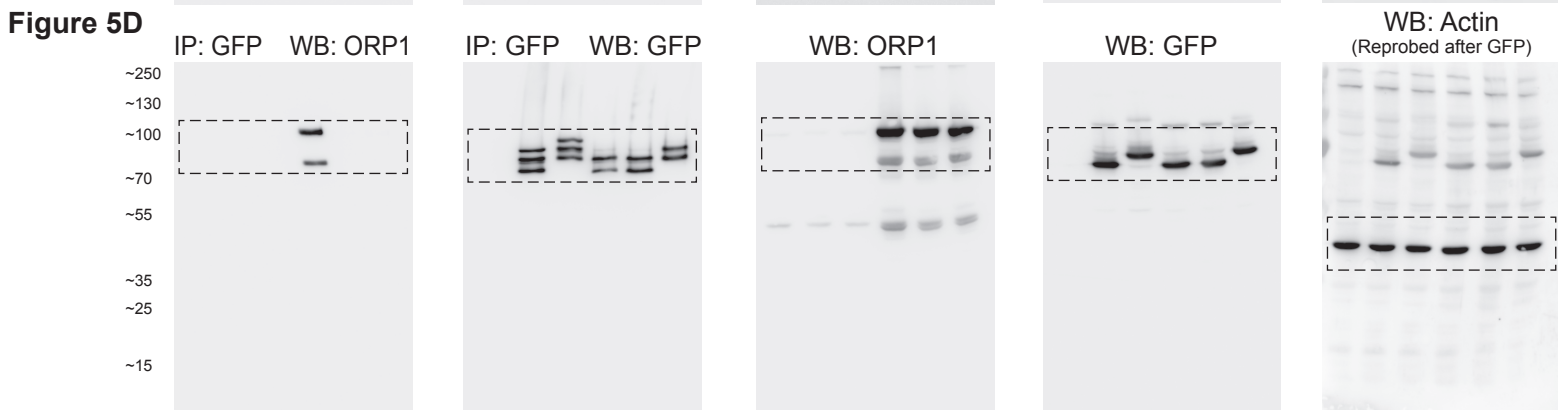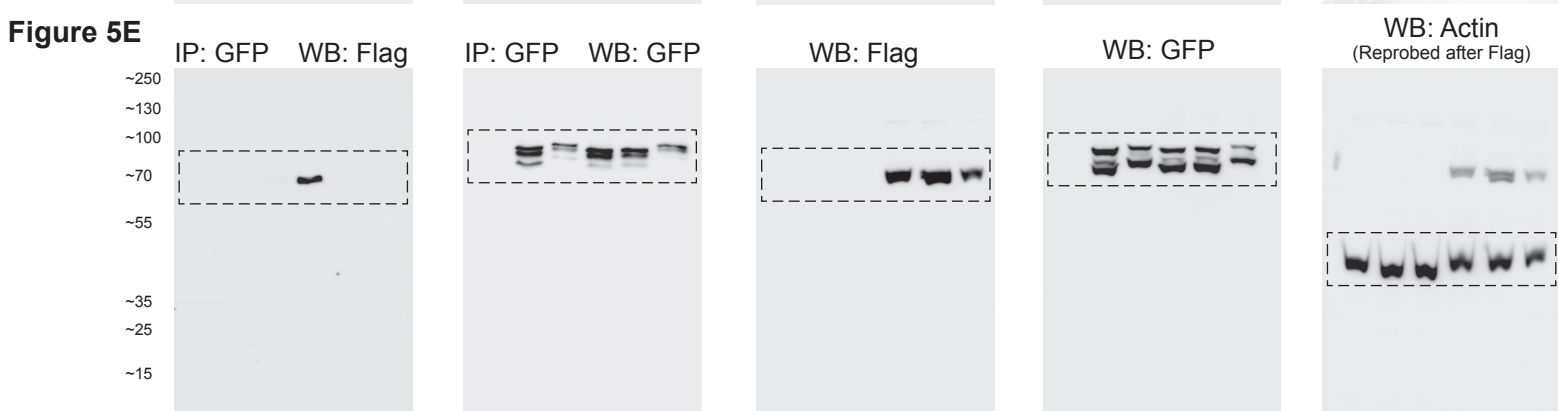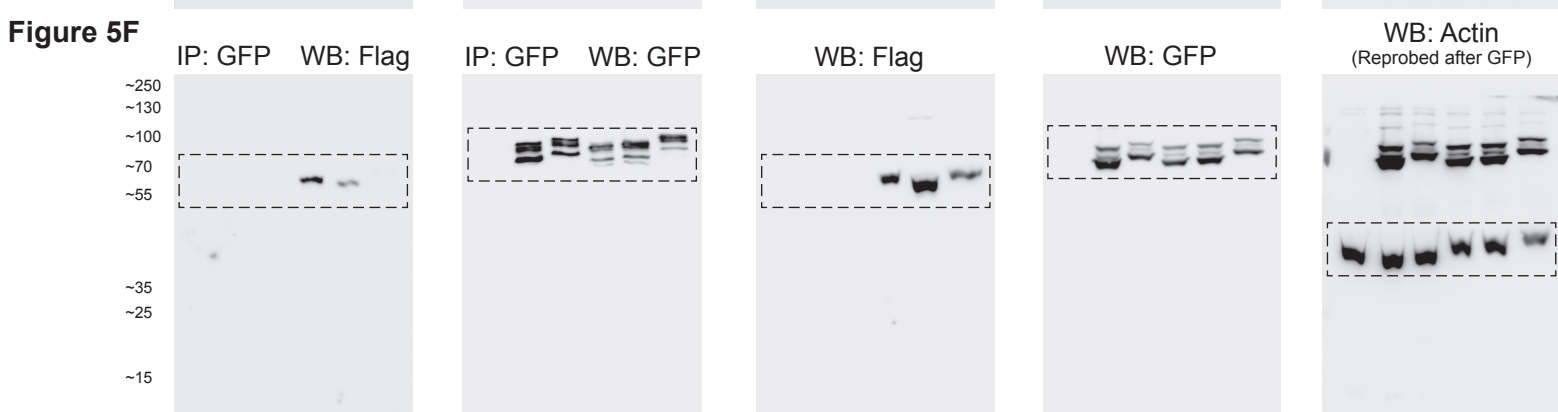

**Figure 5G**

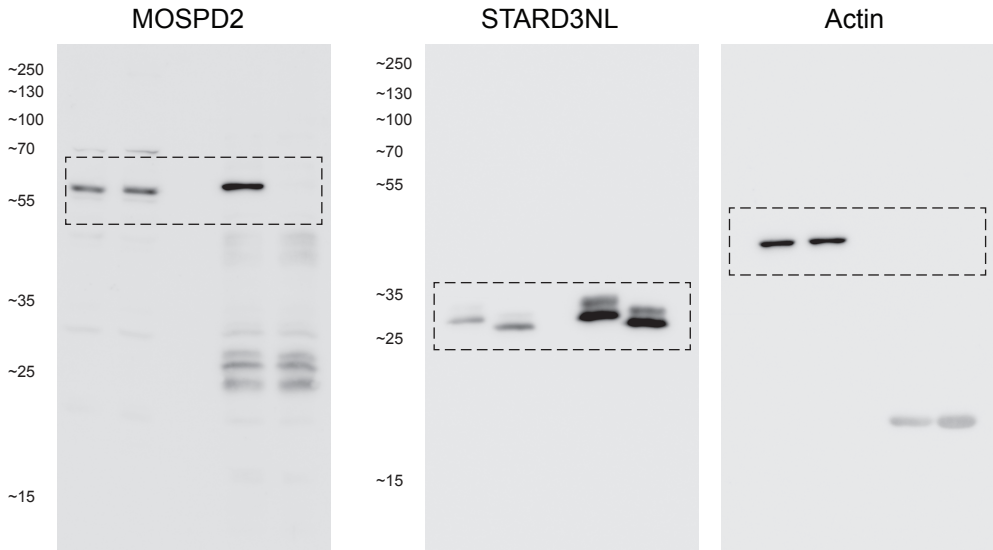

Supplement: EMBR-19-e45453-s004.pdf [file EMBR-19-e45453-s004.pdf]

**Figure 8B**

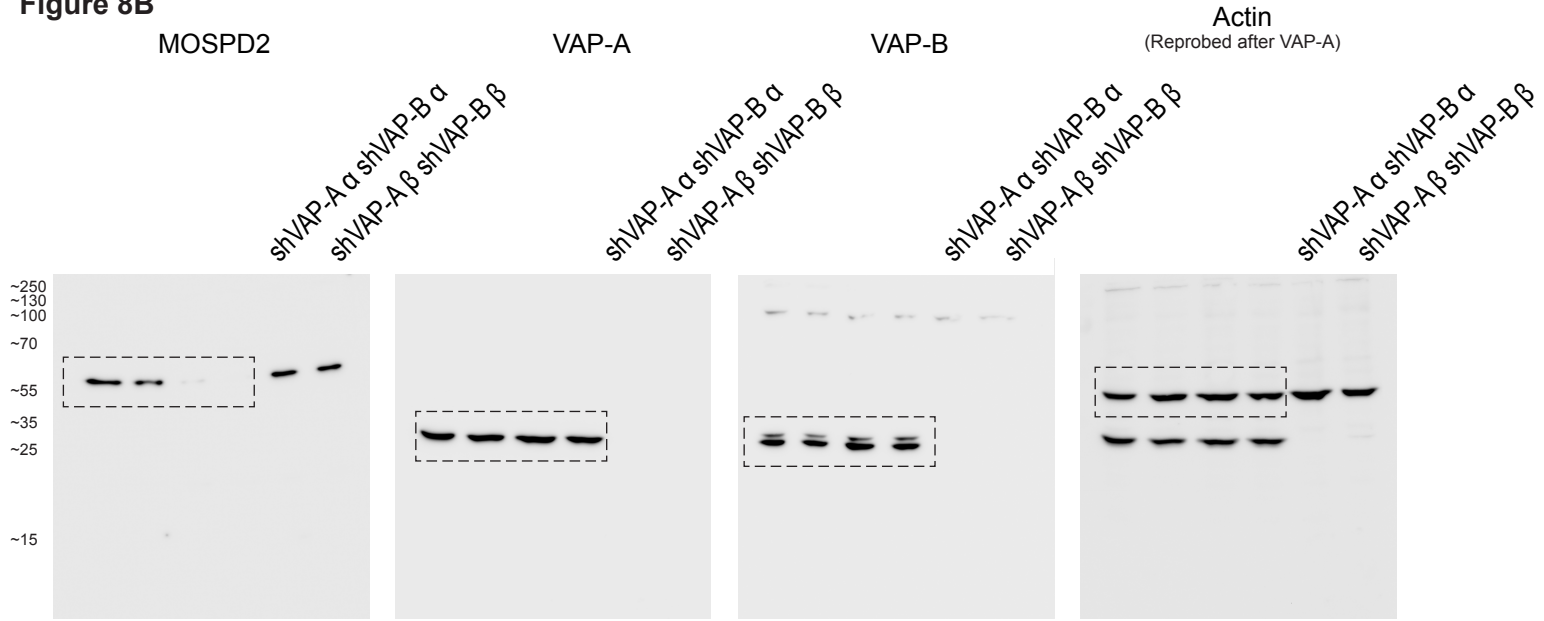

**Western Blot 1**

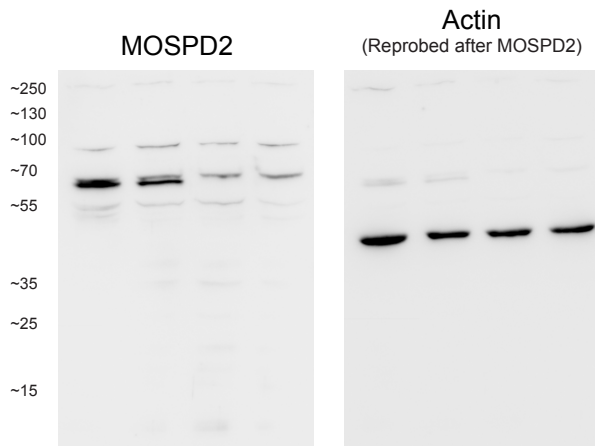

**Western Blot 2**

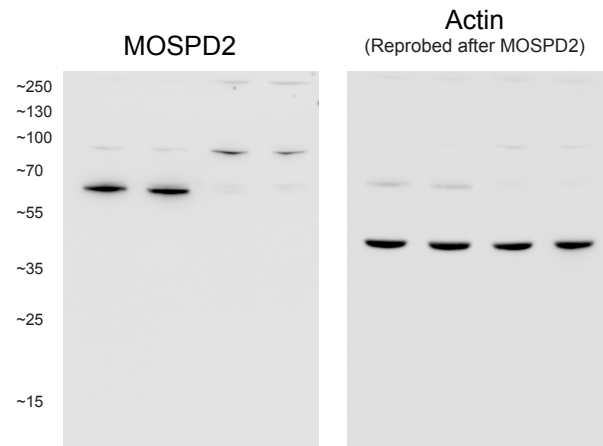

**Western Blot 3**

Supplement: EMBR-19-e45453-s005.pdf [file EMBR-19-e45453-s005.pdf]

**Figure 9A**

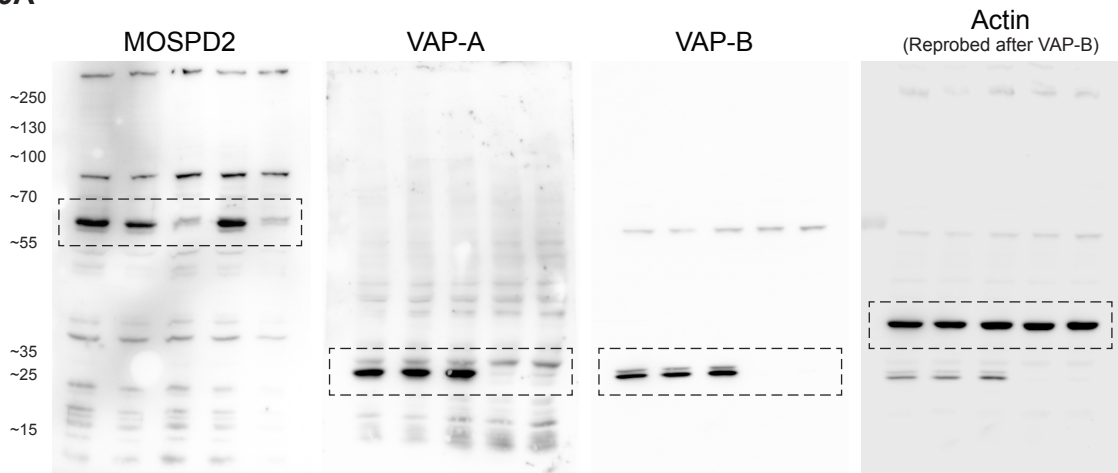

Supplement: EMBR-19-e45453-s006.pdf [file EMBR-19-e45453-s006.pdf]
